# Supplementary material for: Catechin Mediates Ferroptosis to Exert an Anti-Inflammatory Effect on RAW 264.7 Cells
Source: MDPI journal article supplement (doi:10.3390/foods11111572), 2022-05-27
Supplement: s1 [file s1]

## Supplementary Data

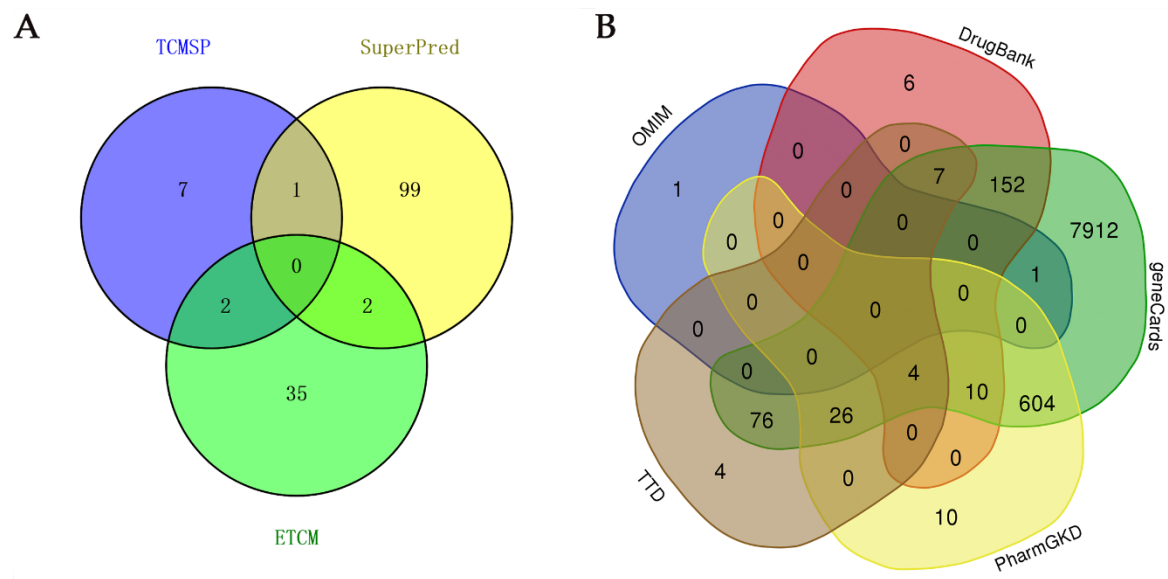

**Figure S1.** The Venn diagrams of catechin and inflammation. (A) Common targets of catechin from three databases. (B) Common genes of inflammation from five databases.

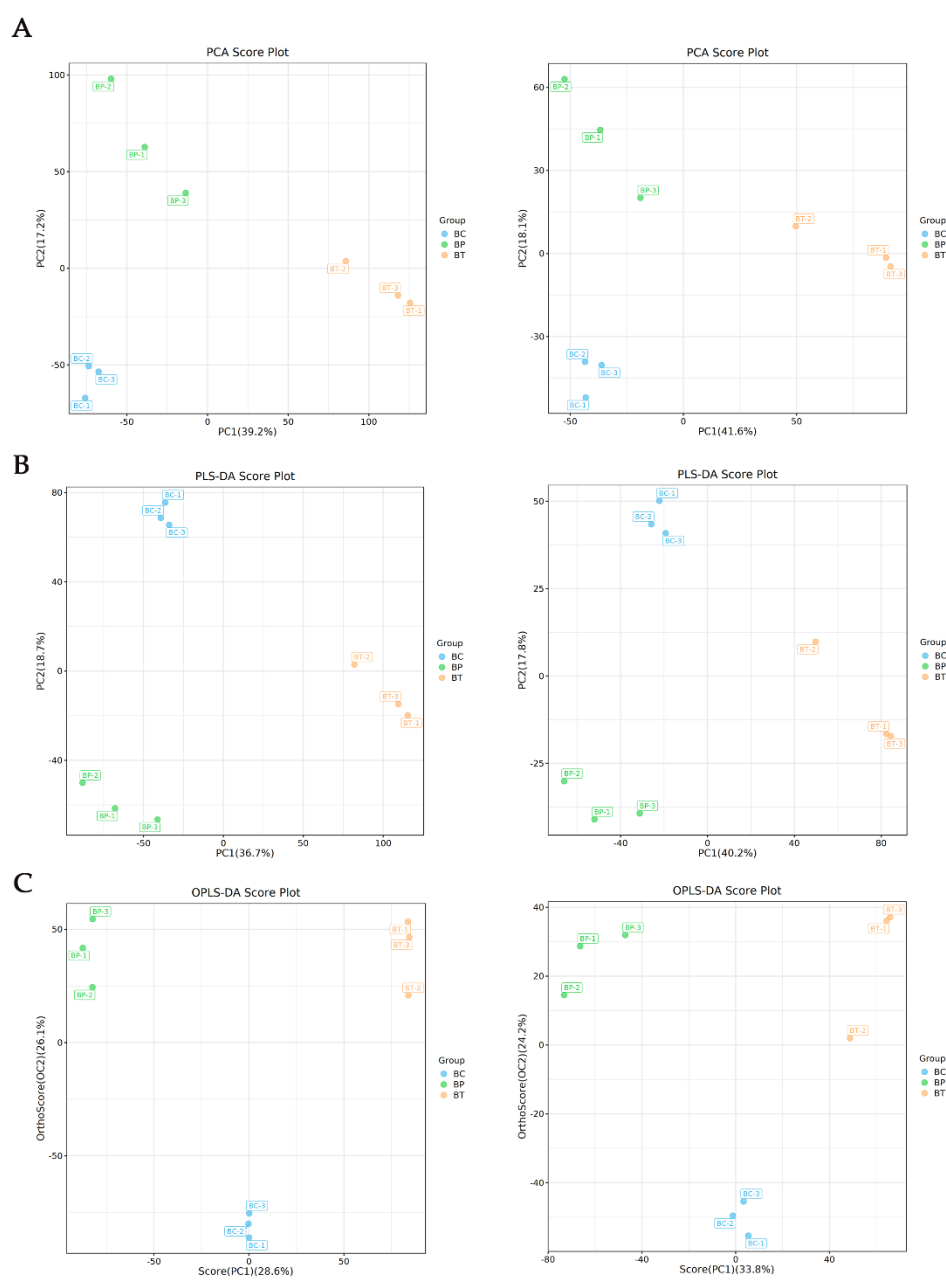

**Figure S2.** The score plots of BT vs BP vs BC group in positive ion mode (diagram on the left) and negative ion mode (diagram on the right). (A) PCA score plot. (B) PLS-DA score plot. (C) OPLS-DA score plot.

**Table S1.** The differential metabolites of BP vs BC group. log<sub>2</sub>FC > 0 means up-regulated, log<sub>2</sub>FC < 0 means down-regulated.

| Differential metabolites            | VIP (VIP > 1) | p-value (p < 0.05) | Fold Change (FC) | log <sub>2</sub> FC |
|-------------------------------------|---------------|--------------------|------------------|---------------------|
| Ureidosuccinic acid                 | 1.622939952   | 0.011579856        | 24.2             | 4.6                 |
| Guanosine                           | 1.604419233   | 0.001903542        | 22.09            | 4.47                |
| UDP                                 | 1.632981406   | 0.000502609        | 17.14            | 4.1                 |
| 1,2,3-Trihydroxybenzene             | 1.587240304   | 0.003072613        | 11.29            | 3.5                 |
| Mannitol                            | 1.644926718   | 0.000187671        | 9.34             | 3.22                |
| Inosine                             | 1.625070515   | 0.000740986        | 8.29             | 3.05                |
| 1-Methyladenosine                   | 1.523413438   | 0.042876353        | 7.64             | 2.93                |
| (S)-3-Methyl-2-oxopentanoic acid    | 1.484410325   | 0.017104315        | 6.36             | 2.67                |
| Nicotinamide ribotide               | 1.495447078   | 0.015696048        | 5.71             | 2.51                |
| 2-Hydroxybutyric acid               | 1.628813917   | 0.000677806        | 4.82             | 2.27                |
| S-Glutathionyl-L-cysteine           | 1.601948386   | 0.001907451        | 4.73             | 2.24                |
| 3-Carbamoyl-2-phenylpropionaldehyde | 1.499814442   | 0.014239804        | 4.3              | 2.11                |
| Aflatoxin B1                        | 1.592934205   | 0.002730316        | 2.96             | 1.57                |
| Porphobilinogen                     | 1.617444166   | 0.00112163         | 2.82             | 1.49                |
| p-Aminobenzoic acid                 | 1.354122971   | 0.046919326        | 2.78             | 1.47                |
| L-Methionine S-oxide                | 1.502145271   | 0.013682001        | 2.26             | 1.18                |
| 20-HETE                             | 1.562477468   | 0.004712729        | 2.25             | 1.17                |
| D-Glucose 1-phosphate               | 1.568890963   | 0.003584314        | 2.12             | 1.08                |
| GMP                                 | 1.53462415    | 0.007821208        | 2.03             | 1.02                |
| D-Fructose                          | 1.540215094   | 0.03575563         | 1.86             | 0.89                |
| 17a-Estradiol                       | 1.435137752   | 0.023987768        | 1.71             | 0.78                |
| 10-Hydroxydecanoic acid             | 1.607890252   | 0.001088382        | 1.39             | 0.47                |
| Xanthylic acid                      | 1.510171526   | 0.011737205        | 1.34             | 0.42                |
| L-Tyrosine                          | 1.407529387   | 0.026862896        | 1.33             | 0.41                |
| Deoxyuridine                        | 1.656563031   | 3.8742E-05         | 0.86             | -0.21               |
| Vanillylmandelic acid               | 1.467376493   | 0.020123282        | 0.8              | -0.32               |
| Estradiol                           | 1.591601473   | 0.002700331        | 0.79             | -0.34               |
| N-methyl-L-glutamic Acid            | 1.574695238   | 0.004218076        | 0.75             | -0.41               |
| Maslinic acid                       | 1.401284182   | 0.034848553        | 0.67             | -0.57               |
| Thiabendazole                       | 1.472241236   | 0.0198582          | 0.64             | -0.65               |
| ADP                                 | 1.448117521   | 0.024028113        | 0.61             | -0.7                |
| Adenine                             | 1.449073633   | 0.024433145        | 0.58             | -0.77               |
| Pentadecanoic acid                  | 1.478286822   | 0.018088158        | 0.51             | -0.97               |
| gamma-Glutamylcysteine              | 1.42688931    | 0.031096212        | 0.45             | -1.15               |
| L-Tryptophan                        | 1.50549845    | 0.014045013        | 0.42             | -1.27               |
| Phosphoglycolic acid                | 1.662795433   | 1.57565E-06        | 0.33             | -1.61               |
| Hypoxanthine                        | 1.612515327   | 0.001504064        | 0.32             | -1.63               |
| Phenyl acetate                      | 1.366488601   | 0.045028537        | 0.32             | -1.66               |
| Cortexolone                         | 1.54548092    | 0.006950782        | 0.31             | -1.7                |

|                          |             |             |      |       |
|--------------------------|-------------|-------------|------|-------|
| Gentisic acid            | 1.377678127 | 0.043383679 | 0.3  | -1.74 |
| beta-Alanyl-L-arginine   | 1.595043759 | 0.002083654 | 0.28 | -1.82 |
| 11-Dehydrocorticosterone | 1.605087412 | 0.001287282 | 0.28 | -1.83 |
| Ribose 1-phosphate       | 1.360162206 | 0.040323585 | 0.27 | -1.89 |
| 3-Dehydroshikimate       | 1.406901012 | 0.034736894 | 0.26 | -1.94 |
| D-Mannose                | 1.645585603 | 2.45446E-05 | 0.18 | -2.5  |
| (S)-4-Hydroxymandelate   | 1.633549597 | 0.009201671 | 0.16 | -2.68 |
| D-Ornithine              | 1.627587318 | 0.000407769 | 0.1  | -3.31 |
| Pyridoxal 5'-phosphate   | 1.558356137 | 0.032960877 | 0.08 | -3.67 |
| Taurine                  | 1.641415239 | 0.000343953 | 0.07 | -3.86 |
| Acetylphosphate          | 1.60249694  | 0.00193708  | 0.02 | -5.4  |

**Table S2.** The differential metabolites of BT vs BP group.  $\log_2FC > 0$  means up-regulated,  $\log_2FC < 0$  means down-regulated.

| Differential metabolites          | VIP (VIP > 1) | p-value (p < 0.05) | Fold Change (FC) | $\log_2FC$ |
|-----------------------------------|---------------|--------------------|------------------|------------|
| L-Serine                          | 1.207780465   | 0.048357367        | 3.38             | 1.76       |
| D-Mannose                         | 1.332811288   | 0.008474664        | 3.32             | 1.73       |
| gamma-Glutamylcysteine            | 1.350096846   | 0.007306674        | 2.77             | 1.47       |
| Biopterin                         | 1.222408711   | 0.044009394        | 2.4              | 1.26       |
| 3-(2-Hydroxyphenyl)propanoic acid | 1.331556278   | 0.010667708        | 1.92             | 0.94       |
| L-Carnitine                       | 1.221286198   | 0.039286437        | 1.63             | 0.7        |
| Alpha-D-Glucose                   | 1.318364612   | 0.013310496        | 1.58             | 0.66       |
| 3-Hydroxyanthranilate             | 1.335237432   | 0.008289068        | 1.48             | 0.57       |
| 2,3-Butanediol                    | 1.286434531   | 0.023278651        | 1.36             | 0.44       |
| Deoxyuridine                      | 1.242857502   | 0.041777372        | 1.04             | 0.06       |
| Adenosine diphosphate ribose      | 1.241584086   | 0.033158743        | 0.82             | -0.28      |
| N-Alpha-acetyllysine              | 1.25120195    | 0.034817407        | 0.72             | -0.47      |
| (S)-1-Phenylethanol               | 1.18987027    | 0.048959018        | 0.69             | -0.53      |
| Porphobilinogen                   | 1.228633844   | 0.041716502        | 0.66             | -0.6       |
| 17a-Estradiol                     | 1.23640275    | 0.02890117         | 0.63             | -0.67      |
| Phosphoglycolic acid              | 1.405589864   | 0.004238856        | 0.6              | -0.74      |
| 2-Hydroxybutyric acid             | 1.251116465   | 0.037188342        | 0.58             | -0.78      |
| L-Tryptophan                      | 1.277679598   | 0.027233062        | 0.56             | -0.84      |
| Pyrrolidonecarboxylic acid        | 1.395707228   | 0.004672702        | 0.55             | -0.86      |
| Benzoate                          | 1.475849822   | 3.69971E-05        | 0.53             | -0.91      |
| N-Acetyl-D-galactosamine          | 1.234889405   | 0.040787724        | 0.53             | -0.92      |
| Thiabendazole                     | 1.450088158   | 0.012117386        | 0.52             | -0.94      |
| Guanidoacetic acid                | 1.424667447   | 0.000382199        | 0.52             | -0.94      |
| Spermidine                        | 1.479421002   | 9.94786E-06        | 0.47             | -1.07      |
| Riboflavin                        | 1.433998294   | 0.001881779        | 0.45             | -1.14      |
| Stearic acid                      | 1.392371466   | 0.002637407        | 0.45             | -1.16      |
| Ketoleucine                       | 1.382424651   | 0.005661913        | 0.44             | -1.17      |
| Erythritol                        | 1.238580504   | 0.026248187        | 0.42             | -1.25      |
| Adenine                           | 1.438230493   | 0.016733346        | 0.41             | -1.27      |
| S-Glutathionyl-L-cysteine         | 1.350657845   | 0.011718718        | 0.39             | -1.35      |
| Vanillic acid                     | 1.275493472   | 0.025531366        | 0.39             | -1.36      |
| Succinic acid                     | 1.428031831   | 0.000156015        | 0.38             | -1.4       |
| L-Methionine S-oxide              | 1.411921836   | 0.003672009        | 0.37             | -1.44      |
| Pantothenol                       | 1.359998964   | 0.043734582        | 0.37             | -1.45      |
| Trehalose                         | 1.432117742   | 0.002103835        | 0.36             | -1.49      |
| D-Ornithine                       | 1.319424058   | 0.008639648        | 0.35             | -1.52      |
| Pentadecanoic acid                | 1.308291198   | 0.012636853        | 0.35             | -1.52      |
| Hypoxanthine                      | 1.442099769   | 0.000809902        | 0.35             | -1.53      |
| Thymidine                         | 1.215041766   | 0.037007677        | 0.34             | -1.55      |

|                                     |             |             |      |       |
|-------------------------------------|-------------|-------------|------|-------|
| O-Acetylserine                      | 1.371563109 | 0.008468973 | 0.34 | -1.56 |
| 1,2,3-Trihydroxybenzene             | 1.408122971 | 0.004251857 | 0.33 | -1.58 |
| p-Octopamine                        | 1.295007341 | 0.021203738 | 0.33 | -1.58 |
| Benzaldehyde                        | 1.278786865 | 0.025487479 | 0.32 | -1.65 |
| beta-Alanyl-L-arginine              | 1.343111929 | 0.007928358 | 0.32 | -1.66 |
| Inosine                             | 1.429164585 | 0.00206919  | 0.31 | -1.67 |
| Oxidized glutathione                | 1.283605121 | 0.018860598 | 0.31 | -1.68 |
| Phthalic acid                       | 1.295249967 | 0.021243012 | 0.3  | -1.73 |
| Xanthylic acid                      | 1.378648746 | 0.007098714 | 0.3  | -1.73 |
| Guanosine                           | 1.381268976 | 0.041686027 | 0.29 | -1.79 |
| Glutathione                         | 1.337756731 | 0.014489726 | 0.29 | -1.8  |
| Ectoine                             | 1.400688248 | 0.003740785 | 0.28 | -1.84 |
| 2-Oxoarginine                       | 1.243893863 | 0.038422295 | 0.28 | -1.85 |
| 11-Dehydrocorticosterone            | 1.386721503 | 0.002852159 | 0.27 | -1.9  |
| Glycerophosphocholine               | 1.46023447  | 0.000607372 | 0.26 | -1.92 |
| Ureidosuccinic acid                 | 1.479845722 | 5.71205E-06 | 0.25 | -1.98 |
| 1-Pyrroline-4-hydroxy-2-carboxylate | 1.395738115 | 0.004950729 | 0.24 | -2.07 |
| (S)-3-Methyl-2-oxopentanoic acid    | 1.226482998 | 0.033345036 | 0.24 | -2.07 |
| 3,4-Dihydroxyphenylpropanoate       | 1.466140827 | 0.007015916 | 0.24 | -2.08 |
| Dehydroepiandrosterone              | 1.292416551 | 0.015907283 | 0.22 | -2.16 |
| Taurine                             | 1.265105248 | 0.032100424 | 0.21 | -2.27 |
| Mannitol                            | 1.449246459 | 0.001098845 | 0.2  | -2.3  |
| N-Acetyl-D-glucosamine              | 1.389311038 | 0.002359598 | 0.18 | -2.47 |
| 3'-AMP                              | 1.19906235  | 0.043677382 | 0.18 | -2.48 |
| Nicotinamide riboside               | 1.440733938 | 0.001151841 | 0.17 | -2.57 |
| Geranyl diphosphate                 | 1.400317948 | 0.005329931 | 0.17 | -2.57 |
| Sphingosine                         | 1.241339286 | 0.040317441 | 0.16 | -2.6  |
| Citric acid                         | 1.414209745 | 0.000799808 | 0.16 | -2.62 |
| Capric acid                         | 1.410583445 | 0.000725976 | 0.15 | -2.74 |
| Pantothenic acid                    | 1.309566291 | 0.011453971 | 0.15 | -2.75 |
| Dihydrofolic acid                   | 1.205345815 | 0.04140462  | 0.14 | -2.8  |
| Azelaic acid                        | 1.368099437 | 0.00374816  | 0.14 | -2.85 |
| Ribose 1,5-bisphosphate             | 1.329214813 | 0.009306016 | 0.14 | -2.88 |
| Uridine diphosphategalactose        | 1.363741751 | 0.00335942  | 0.13 | -2.89 |
| Isocitric acid                      | 1.449083607 | 0.001141105 | 0.13 | -2.98 |
| N-Glycolylneuraminic acid           | 1.209946927 | 0.037959763 | 0.12 | -3.06 |
| Erucic acid                         | 1.175141578 | 0.049837336 | 0.11 | -3.23 |
| Dehypoxanthine futasine             | 1.226364242 | 0.043763118 | 0.1  | -3.26 |
| Xanthine                            | 1.376565592 | 0.035412126 | 0.1  | -3.28 |
| GMP                                 | 1.387077366 | 0.002758109 | 0.1  | -3.34 |
| Indican                             | 1.188458288 | 0.049944765 | 0.09 | -3.45 |
| Glucosamine 6-phosphate             | 1.237910351 | 0.027760581 | 0.05 | -4.37 |
| Deoxycorticosterone acetate         | 1.374885226 | 0.003289652 | 0.05 | -4.37 |
| Sulfamethazine                      | 1.464744836 | 0.000334869 | 0.05 | -4.46 |

|                        |             |             |      |       |
|------------------------|-------------|-------------|------|-------|
| Alprenolol             | 1.426019471 | 0.002444742 | 0.04 | -4.55 |
| S-Adenosylhomocysteine | 1.301102605 | 0.0231619   | 0.04 | -4.64 |
| 5'-Methylthioadenosine | 1.435792199 | 6.40747E-05 | 0.03 | -5.08 |
